# Supplementary material for: ARID1A mutation sensitizes most ovarian clear cell carcinomas to BET inhibitors
Source: PubMed Central journal article supplement (PMC6095834; doi:10.1038/s41388-018-0300-6), 2018-05-15
Supplement: 41388_2018_300_MOESM1_ESM.pdf [file 41388_2018_300_MOESM1_ESM.pdf]

# Suppl. Figure 1

| ES2           | RMGI          | JHOC5         | OVCA429     | OV207         |
|---------------|---------------|---------------|-------------|---------------|
| ARID1A WT     | ARID1A WT     | ARID1A WT     | ARID1A WT   | ARID1A WT     |
| CDC2L1;CDC2L2 | CDC2L1;CDC2L2 | BUB1B         | PTK2        | CDC2L1;CDC2L2 |
| PLK1;RPL37A   | CHEK1         | CDC2L1;CDC2L2 | PRKAA1      | CHEK1         |
| BMPR1A        | PLK1          | SRPK3         | TIE1        | MAP4K2        |
| DYRK1B        | EGFR          | PLK1;RPL37A   | CHEK1       | PAK1          |
| CDKL4         | POLD1         | FGFR1         | PLK1;RPL37A | PLK1          |
| RIOK2         | KDR           | CHEK1         | RIPK3       | AURKB         |
| CHEK1         | PLK1;RPL37A   | VRK2          | AURKB       | MAP4K3        |
| TRRAP         | ATR           | ADRBK2        | TRIM33      | PLK1;RPL37A   |
| BRD4          | TAF1          | RPS6KA4       | ADRBK2      | FRAP1         |
| TGFBR1        | VRK3          | PTK7          | MAP3K12     | MYLK          |
| SNF1LK2       | SNF1LK2       | ICK           | CCL14;CCL15 | SMG1          |
| ALPK2         | PI4KA         | PIK3CB        | EEF2K       | ICK           |
| ICK           | TIE1          | AURKB         | WEE1        | PRKAA1        |
| TAF1          | STK3          | DDR1          | EPHA5       | TRRAP         |
| EPHA5         | PI4KB         | MAPK6         | PSKH1       | MERTK         |
| RPS6KL1       | SMG1          | TXK           | MUSK        | CDC2L6        |
| PRKDC         | VRK1          | PRKAA1        | MYO3B       | BRSK2         |
| CIT           | PDPK1         | KDR           | PRKCQ       | SNF1LK2       |
| TIE1          | PIK3R2        | ABL2          | SNF1LK2     | PI4KB         |
| BUB1B         | BRD4          | STK35         | GRK6        | AKT3          |
| MYLK          | ULK3          | MYLK          | OBSCN       | DYRK1A        |
| EEF2K         | TRRAP         | RAF1          | SGK3        |               |
| SGK269        |               | LONP1         | DGKH        |               |
| NEK8          |               | MAPK3         | ITK         |               |
| EPHA6         |               | TRIO          | MYLK        |               |
| ABL1;BCR      |               | NRBP2         | CDKL3       |               |
| TLK1          |               | ERBB3         | TAF1        |               |
| PCTK1         |               | ANTXR1        | ERBB3       |               |
| RORA          |               | PIK3C2G       | PRKX        |               |
| RIPK3         |               | PLK4          | MARK1       |               |
| SPHK1         |               | TAF1          | CIT         |               |
| ADRBK2        |               | FRAP1         | MAP2K5      |               |
| ERBB3         |               | RIPK3         | FGFR1       |               |
| TRIB2         |               | TNK2          | ADCK5       |               |
| KSR2          |               | SPHK1         | RIPK2       |               |
| NR4A3         |               | PTK2          | PASK        |               |
| NPR1          |               | TRRAP         | PCTK1       |               |
| ALPK1         |               | OBSCN         | PTK7        |               |
| AURKA         |               | STK16         | TYK2        |               |
| ATM           |               | ULK3          | NTRK1       |               |
| CDKL1         |               | EEF2K         | ULK3        |               |
| ANTXR1        |               | STK25         | PFTK1       |               |
| JAK1          |               | POLD1         | FYN         |               |
| CDKL3         |               | DGKH          | PIK3R2      |               |
| CCL14;CCL15   |               | BMPR1A        | EPHA3       |               |
| FRAP1         |               | ATR           | MAP3K14     |               |
| SLTM          |               | PCTK1         | PKN1        |               |
| MAP3K7        |               | EIF2AK1       | MAST3       |               |
| NTRK2         |               | PINK1         | MLKL        |               |
| TSSK6         |               | NTRK1         | STK39       |               |
| PI4KB         |               | CCL14;CCL15   | INSRR       |               |
| PIK3R2        |               | TEC           | BMP2K       |               |
| BMP2K         |               | TGFBR2        | KSR1        |               |
| TYK2          |               | PRKCZ         | CLK2;CLK2P  |               |
| LMTK3         |               | MARK1         | RP6         |               |
| PIK3C2G       |               | MELK          | NEK6        |               |
| RIOK3         |               | TYK2          | RPS6KA4     |               |
| MMAB          |               | SRPK2         | PAK6        |               |
| DGKE          |               | PDPK1         | STRADA      |               |
| AMHR2         |               | TRIM33        | STK32A      |               |
| WEE1          |               | CSNK1G2       | SGK1        |               |
| MARK1         |               | PRKDC         | CSNK1G2     |               |
| MARK3         |               | ATM;NPAT      | NUAK1       |               |
| PIK3R1        |               | SGK1          | TEC         |               |
| ULK3          |               | CLK2;CLK2P    | SPEG        |               |
| PTK2          |               | CIT           | RAF1        |               |
| MAPK6         |               | PASK          | EPHA7       |               |
| KSR1          |               | NPR1          | PKLR        |               |
| SCYL1         |               | KIAA1804      | RORA        |               |
| AKT3          |               | NEK7          | NUAK2       |               |
| EIF2AK3       |               | NUAK2         | EPHB4       |               |
| KIAA0999      |               | ERBB2         | EPHA2       |               |
| CLASP1        |               | RPS6KA3       | RNMT        |               |
| PCTK2         |               | PRKG1         | PIK3R4      |               |
| TEX14         |               | KSR2          | TAOK2       |               |
| PRKG1         |               | LYN           |             |               |
| DGKH          |               | PIK3CD        |             |               |
| WNK1          |               | MAP2K5        |             |               |
| DHDDS         |               | EPHB4         |             |               |
| PTK7          |               | CCL13         |             |               |
| HIPK4         |               | NR4A3         |             |               |
| STK32A        |               | MAP3K10       |             |               |
| CLK2;CLK2P    |               |               |             |               |
| ATR           |               |               |             |               |
