# Supplementary material for: ARID1A mutation sensitizes most ovarian clear cell carcinomas to BET inhibitors
Source: PubMed Central journal article supplement (PMC6095834; doi:10.1038/s41388-018-0300-6), 2018-05-15

# Suppl. Figure 5

## A

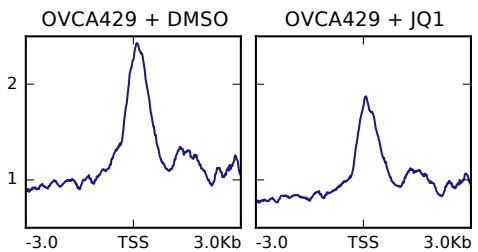

## B

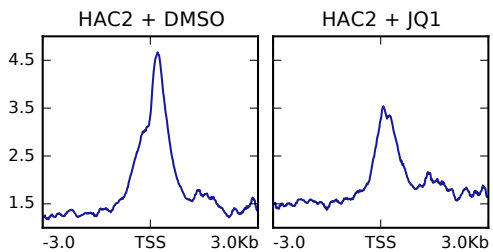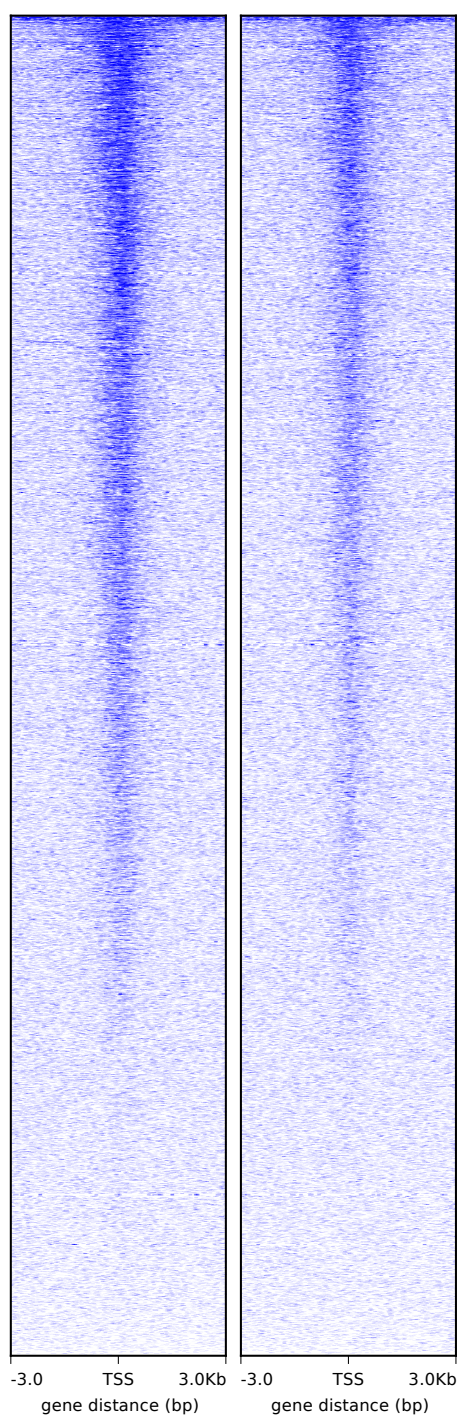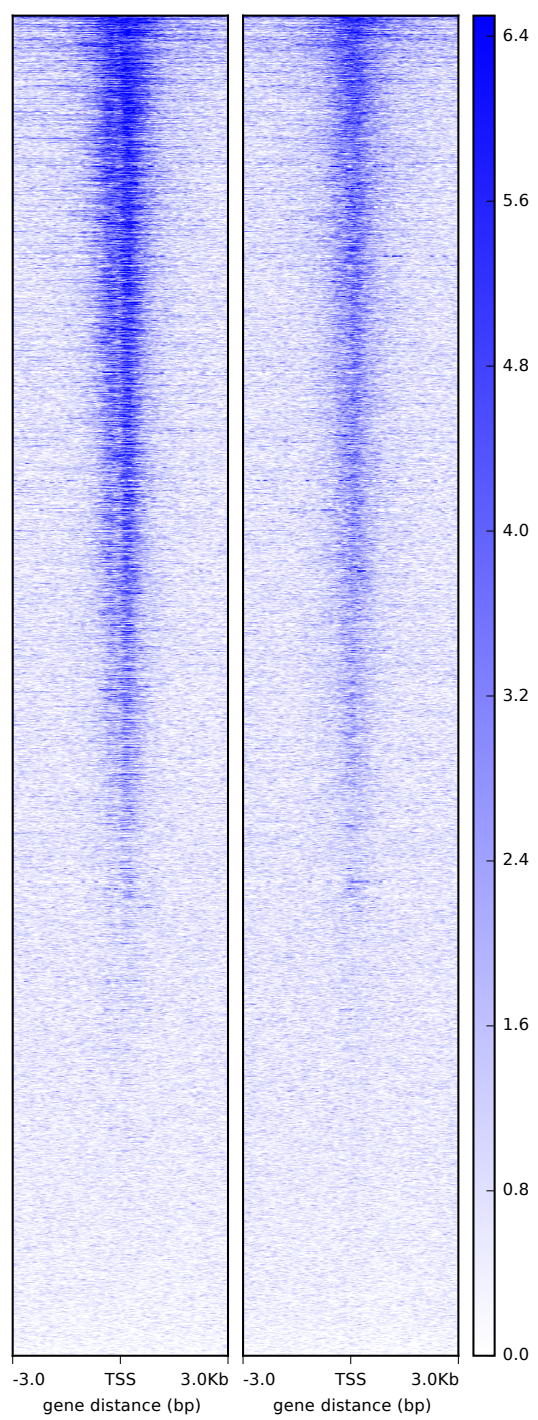

Supplement: 41388_2018_300_MOESM5_ESM.pdf [file 41388_2018_300_MOESM5_ESM.pdf]
