# Supplementary material for: ARID1A mutation sensitizes most ovarian clear cell carcinomas to BET inhibitors
Source: Oncogene. 2018 May 15;37(33):4611–25. doi: 10.1038/s41388-018-0300-6 (PMC6095834; doi:10.1038/s41388-018-0300-6)
Supplement: Supplementary file 2 — Figure S2. TRC kinome lethal hitlists for the ARID1A mutant lines [file 41388_2018_300_MOESM2_ESM.pdf]

Suppl. Figure 2

| TOV21G        | OVTOKO        | HAC2        | OVMANA        | TUOC1         | OVAS          | KOC7C       | RMGII      | SMOV2      |
|---------------|---------------|-------------|---------------|---------------|---------------|-------------|------------|------------|
| ARID1A mut    | ARID1A mut    | ARID1A mut  | ARID1A mut    | ARID1A mut    | ARID1A mut    | ARID1A mut  | ARID1A mut | ARID1A mut |
| SMG1          | PLK1;RPL37A   | WNK1        | PLK1;RPL37A   | CDC2L1;CDC2L2 | SMG1          | PRKAA1      | MYO3B      | CHEK1      |
| CDC2L1;CDC2L2 | EPHB2         | ERBB4       | CDC2L1;CDC2L2 | PLK1;RPL37A   | CDC2L1;CDC2L2 | MYO3B       | PIK3R2     | MYO3B      |
| PLK4          | PLK1          | FRAP1       | FRAP1         | PLK1          | CCL14;CCL15   | PIK3R4      | RAF1       | MAPKAPK5   |
| PLK1          | POLD1         | PLK1        | BUB1B         | PLK4          | MYO3A         | FRAP1       | MAP3K12    | DGKH       |
| AURKB         | RPS6KB1       | CDC2        | CDK2          | SMG1          | PRKG2         | CHEK1       | TGFBR2     | PTK2       |
| PLK1;RPL37A   | CABC1         | MASTL       | RAF1          | MERTK         | PLK1;RPL37A   | RIOK2       | RIPK2      | LIMK1      |
| PDPK1         | BRD4          | PRKAA1      | KDR           | CDK2          | FRAP1         | SMG1        | DDR1       | PLK4       |
| CAMK4         | LMTK3         | DYRK1A      | PLK1          | PI4KB         | EPHA5         | PLK1;RPL37A | PRKCI      | NTRK1      |
| EPHA2         | ADCK5         | PLK1;RPL37A | MYO3B         | MAPK15        | BRD4          | TGFBR1      | CDKL2      | CAMK2G     |
| RPS6KA4       | ADCK4         | EGFR        | ERBB3         | BUB1B         | SGK1          | RAF1        | CSNK1G2    | ROR2       |
| ALPK2         | CDC2L1;CDC2L2 | RPS6KA4     | DHDDS         | PRPF4B        | HIPK2         | ICK         | WNK1       | IRAK3      |
| FYN           | AATK          | NPR1        | RPS6KA4       | PRKAA1        | AURKB         | AURKA       |            | BRD2       |
| TIE1          | NEK8          | VRK1        | TAF1          | FRAP1         | CDK2          | BUB1B       |            | CDK9       |
| ICK           | STRADB        | ROR2        | BMPR1A        | CRKRS         | MST1R         | MAP4K3      |            | PRKACB     |
| BUB1B         | EEF2K         | MELK        | STK11         | ERBB3         | PIK3R4        | MAP3K6      |            | ATM;NPAT   |
| POLD1         | MAST3         | TRIM24      | TRRAP         | CHEK1         | WEE1          | MYLK        |            |            |
| WEE1          | RPS6KL1       | SLTM        | CDKL5         | MAPKAPK5      | SGK269        | PCTK1       |            |            |
| CCL14;CCL15   | TSSK2         | MAP4K3      | CDK5          | SGK3          | TIE1          | EPHA2       |            |            |
| MAP3K7        | MYO3B         | CSNK1G2     | MMAB          | EPHA6         | TEX14         | ALPK2       |            |            |
| LATS2         | PTK7          | TIE1        | PIK3C3        | AURKB         | RIPK3         | PIK3C2G     |            |            |
| PRKX          | NRBP2         | MAP3K8      | EPHA6         | RIPK3         | RAF1          | STK32A      |            |            |
| BRD2          | TYK2          | IKBKB       | SMG1          | SLTM          | RIOK2         | KDR         |            |            |
| PRKAA2        | ADRBK2        | TYK2        | PIK3CB        | EGFR          | MYLK          | WNK1        |            |            |
| FRAP1         | ICK           | PRKD2       | MAST3         | CDKL3         | ULK3          | CLK2;CLK2P  |            |            |
| GSK3B         | STK25         | MAPK15      | PI4KB         | ATM;NPAT      | PTK2          | STK16       |            |            |
| CLK2;CLK2P    | TRRAP         | YES1        | EIF2AK3       | PDPK1         | PRKDC         | MAPK6       |            |            |
| CHEK1         | ALPK2         | FER         | MARK3         | HIPK1         | SNF1LK2       | DGKH        |            |            |
| TRRAP         | INSRR         | BUB1        | CDC2          | PCTK2         | CLK2;CLK2P    | NPR1        |            |            |
| EEF2K         | CIT           | KDR         | MAPK8         | PI4KA         | TAF1          | STK33       |            |            |
| PRKDC         | RAC1          | MMAB        | CCL14;CCL15   | PRKCI         | PRKAA1        | KIAA1804    |            |            |
| BMP2K         | STK3          | PDPK1       | ANTXR1        | TRIM33        | NPR1          | SNF1LK2     |            |            |
| EIF2AK3       | CSNK1A1       | TRRAP       | PNCK          | TRRAP         | MAP3K12       | EIF2AK3     |            |            |
| LIMK2         | RIPK3         | BTk         | PAK2          | MAP3K1        |               | RP6         |            |            |
| TNK2          | NPR1          | PKN2        | ROR2          | ROR2          |               | HIPK1       |            |            |
| HCK           | VRK1          | MAPK6       | STK3          | NTRK1         |               | ATM         |            |            |
| ATR           | TLK1          | PRKX        | CSNK1G2       | MAP4K3        |               | CDKL3       |            |            |
| TGFBR2        | MAP3K10       | PTK2        | WNK1          | RIOK2         |               | CSNK1G2     |            |            |
| CDKL3         | TAF1          | MAP3K6      | PDPK1         | MELK          |               | CCL14;CCL15 |            |            |
| CIT           | MARK1         | RIPK3       | ABL2          | DHDDS         |               | MARK3       |            |            |
| NEK9          | SCYL3         | PRKCQ       | PRKACA        | CDKL4         |               | PKN1        |            |            |
| LMTK3         | STK32C        | BRD2        | EPHA10        | ATR           |               | ATM;NPAT    |            |            |
| PIM1          | NEK7          | ERBB3       | CDKL4         | PRKDC         |               | TTK         |            |            |
| NR4A3         | FYN           | POLD1       | WEE1          | ALPK2         |               | PASK        |            |            |
| VRK3          | MAPK8         | PKN1        | MAPK10        | RPS6KB1       |               | CDC2        |            |            |
| BMPR1A        | NTRK1         | PI4KA       | NEK8          | PIK3CA        |               | RORA        |            |            |
| NTRK1         | KSR2          | RAF1        | PTK7          | TRPM7         |               | SNRK        |            |            |
| CSNK1D        | NR4A3         | PRKDC       | LIMK2         | SNF1LK2       |               | RIPK3       |            |            |
| MAPK6         | PCTK2         | EPHA6       | MAP2K5        | WNK1          |               | RIPK5       |            |            |
| PRKCQ         | TRIM28        | ANTXR1      | PAK6          | MAPK1         |               | IRAK3       |            |            |
| TAF1          | MKNK2         | PRPF4B      | STK32A        | STK25         |               |             |            |            |
| ULK3          | RPS6KA4       | PRKACB      | CSNK1A1       | MLKL          |               |             |            |            |
| RAF1          | PAK2          | CLASP1      | CLK2;CLK2P    | PKN2          |               |             |            |            |
| PRPF4B        | RIPK4         | ATR         | MYO3A         | PRKCQ         |               |             |            |            |
| RIPK3         | PKN2          | CDK2        | BRD2          | WEE1          |               |             |            |            |
| MAP4K3        | VRK3          | KIAA1804    | TTK           | PRKACB        |               |             |            |            |
| MELK          | KSR1          | EPHB4       | GPI           | EPHA5         |               |             |            |            |
| JAK2          | PIK3C2G       | SMG1        | ITK           | MYLK          |               |             |            |            |
| IRAK2         | MAP3K15       | DMPK        | HIPK1         | EPHA2         |               |             |            |            |
| SNF1LK2       | CDKL1         | VRK2        | MAP4K3        | BRD4          |               |             |            |            |
| KSR1          | MYO3A         | STK35       |               | PIK3R4        |               |             |            |            |
| PASK          | MARK4         | NEK7        |               | STK39         |               |             |            |            |
| PTK7          | HIPK4         | PIK3CA      |               | RPS6KA2       |               |             |            |            |
| ROCK1         | PRKCG         | MAPK1       |               | MYO3B         |               |             |            |            |
| PTK6          | ADCK1         | CAMK2G      |               | IKBKB         |               |             |            |            |
| TRIO          | PINK1         | STK31       |               | RAF1          |               |             |            |            |
| CSNK1G2       | HIPK1         | ICK         |               | PRKCZ         |               |             |            |            |
| CDK4          | BRD2          | BUB1B       |               | ACVR1C        |               |             |            |            |
| DHDDS         | DGKE          | MAP2K3      |               | MAPK8         |               |             |            |            |
| EPHB1         | SCYL2         | TAF1        |               | RIOK1         |               |             |            |            |
| SLTM          | GUCY2C        | PCTK1       |               | PKN1          |               |             |            |            |
| EPHB4         | STK35         | CAMK1G      |               |               |               |             |            |            |
| SCYL2         | CDKL5         |             |               |               |               |             |            |            |
| MARK1         | PI4KB         |             |               |               |               |             |            |            |
| CABC1         | FASTK         |             |               |               |               |             |            |            |
| TRIM33        | PKN1          |             |               |               |               |             |            |            |
| ERBB3         | MASTL         |             |               |               |               |             |            |            |
| MKNK2         | TRIB2         |             |               |               |               |             |            |            |
| MAPK8         | PRKCQ         |             |               |               |               |             |            |            |
| LMTK2         | BRAF;KIAA1549 |             |               |               |               |             |            |            |
| DYRK1B        | CDC42BPG      |             |               |               |               |             |            |            |
| MYLK          |               |             |               |               |               |             |            |            |
| BUB1          |               |             |               |               |               |             |            |            |
| FGR           |               |             |               |               |               |             |            |            |
| ERBB2         |               |             |               |               |               |             |            |            |
